# Supplementary material
Source: MDPI journal article supplement (https://www.mdpi.com/2073-445X/12/3/549)
Supplement: s1 [file s1 › land-2221859-supplementary.pdf]

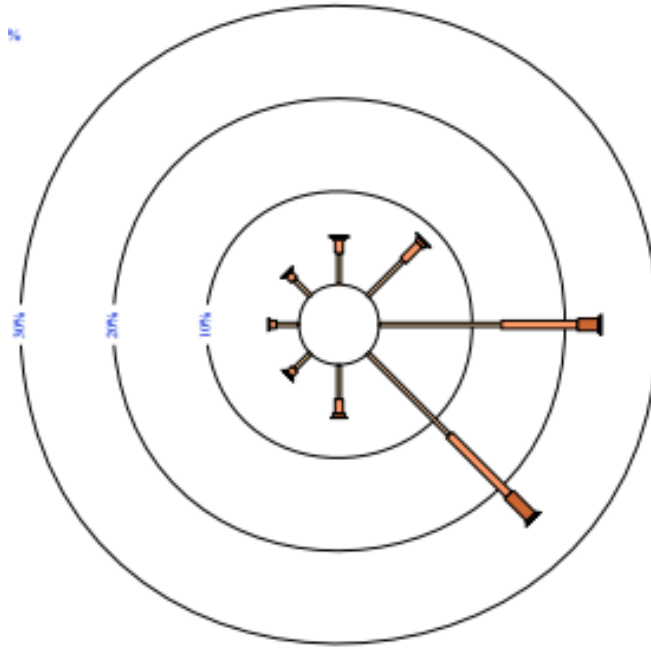

**Figure S1.** Long term wind rose for Elliott (HS and MU).

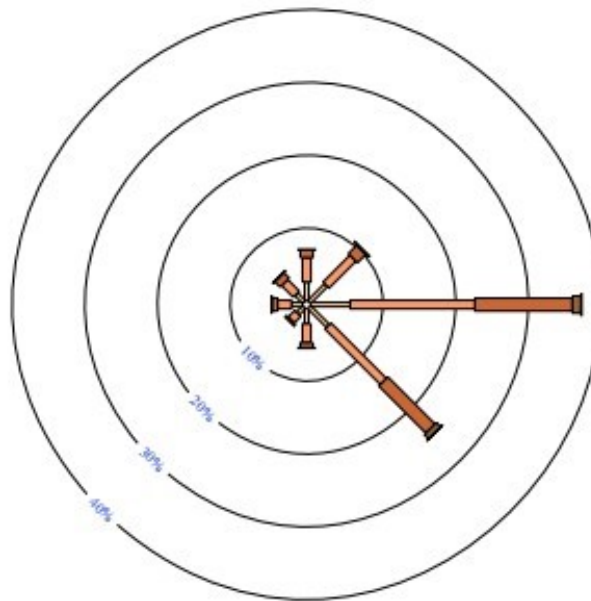

**Figure S2.** Long term wind rose for Tennant Creek (TC).
